# Supplementary material for: Delicate balance among thermal stability, binding affinity, and conformational space explored by single-domain VHH antibodies
Source: PubMed Central journal article supplement (PMC8523659; doi:10.1038/s41598-021-98977-8), 2021-10-18
Supplement: 41598_2021_98977_MOESM1_ESM.pdf [file 41598_2021_98977_MOESM1_ESM.pdf]

## SUPPLEMENTARY FIGURES AND TABLES

### **Delicate balance among thermal stability, binding affinity, and conformational space explored by single-domain V<sub>H</sub>H antibodies**

Emina Ikeuchi<sup>1,2,†</sup>, Daisuke Kuroda<sup>1,3,4,†</sup>, Makoto Nakakido<sup>1,4</sup>, Akikazu Murakami<sup>5</sup>, and Kouhei Tsumoto<sup>1,3,4,6,\*</sup>

<sup>1</sup> Department of Bioengineering, School of Engineering, The University of Tokyo, Tokyo 108-8639, Japan

<sup>2</sup> Panasonic Corporation Technology Division, Kyoto 619-0237, Japan

<sup>3</sup> Medical Device Development and Regulation Research Center, School of Engineering, The University of Tokyo, Tokyo 108-8639, Japan

<sup>4</sup> Department of Chemistry and Biotechnology, School of Engineering, The University of Tokyo, Tokyo, Japan

<sup>5</sup> Department of Parasitology and Immunopathoetiology, Graduate School of Medicine University of the Ryukyus, Okinawa 903-0215, Japan

<sup>6</sup> Laboratory of Medical Proteomics, The Institute of Medical Science, The University of Tokyo, Tokyo 108-8639, Japan

†These authors contributed equally to this work

\*Correspondence should be addressed: KT ([tsumoto@bioeng.t.u-tokyo.ac.jp](mailto:tsumoto@bioeng.t.u-tokyo.ac.jp))

**Figure S1. SPR response profiles of the antibodies.**

**Figure S2. Binding curve from SPR analysis of the G78A mutant.**

**Figure S3. A cavity observed inside the predicted structure of Z18.**

**Figure S4. RMSD of C $\alpha$ -atoms of entire antibody structures.**

**Figure S5. RMSD of C $\alpha$ -atoms of each CDRs.**

**Figure S6. Fraction of native contacts.**

**Table S1. Structural templates used in antibody modeling.**

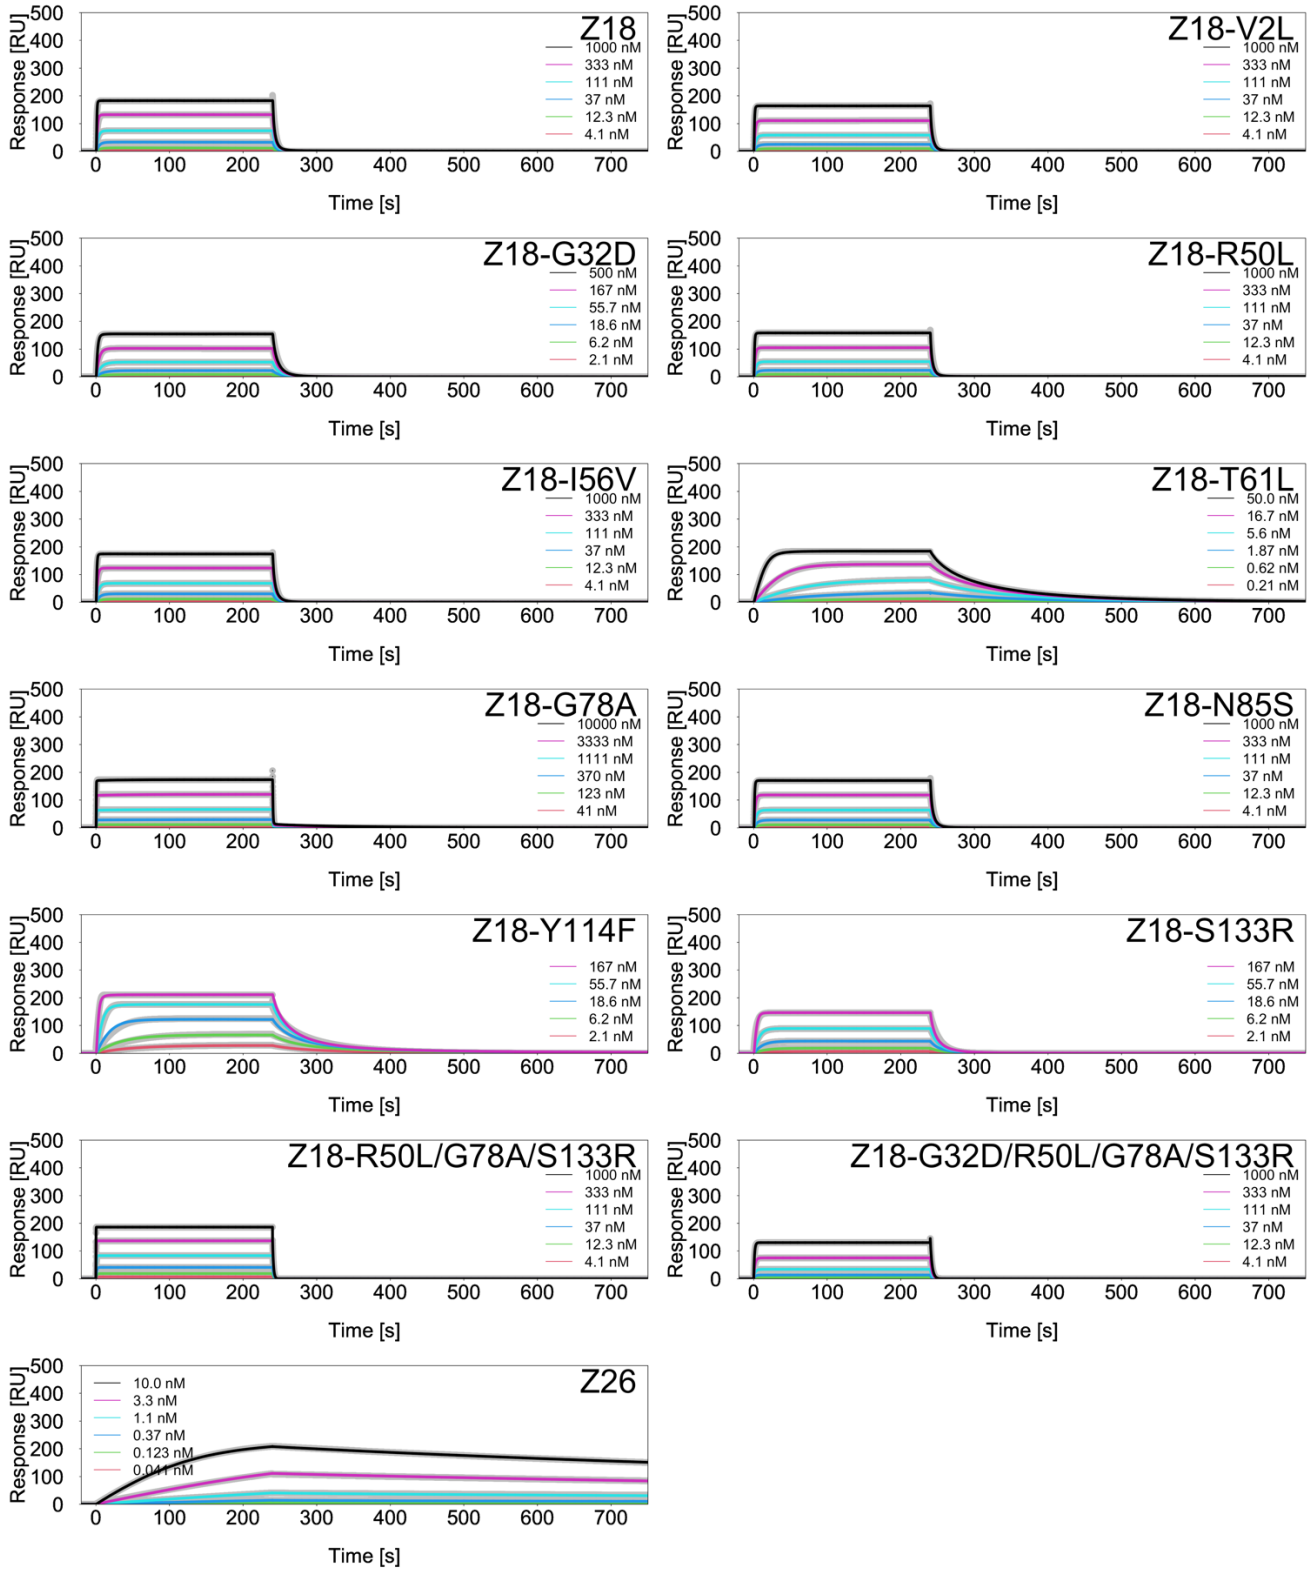

**Figure S1. SPR response profiles (raw) of the antibodies. Fitting curves are shown in grey lines.**

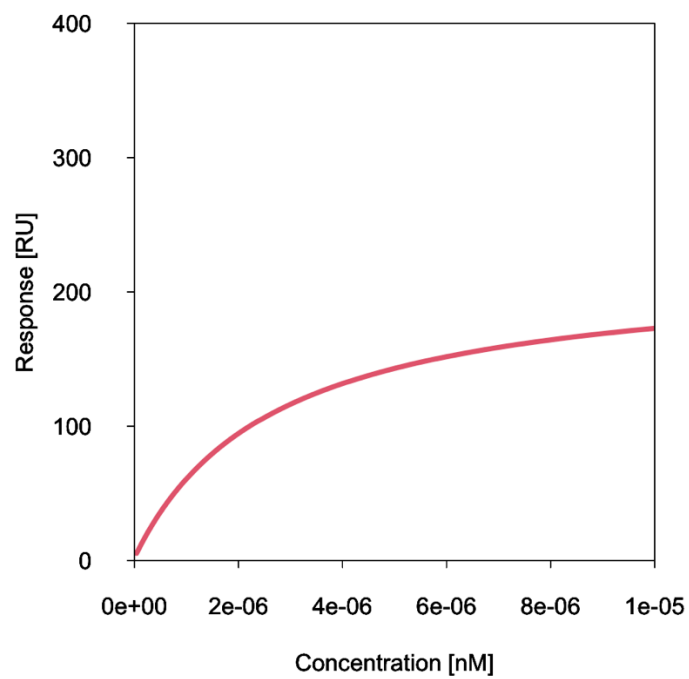

**Figure S2. Binding curve from SPR analysis of the G78A mutant.** Due to the low affinity ( $K_D = 7.11 \times 10^{-6}$  M), the affinity was determined by steady state analysis.

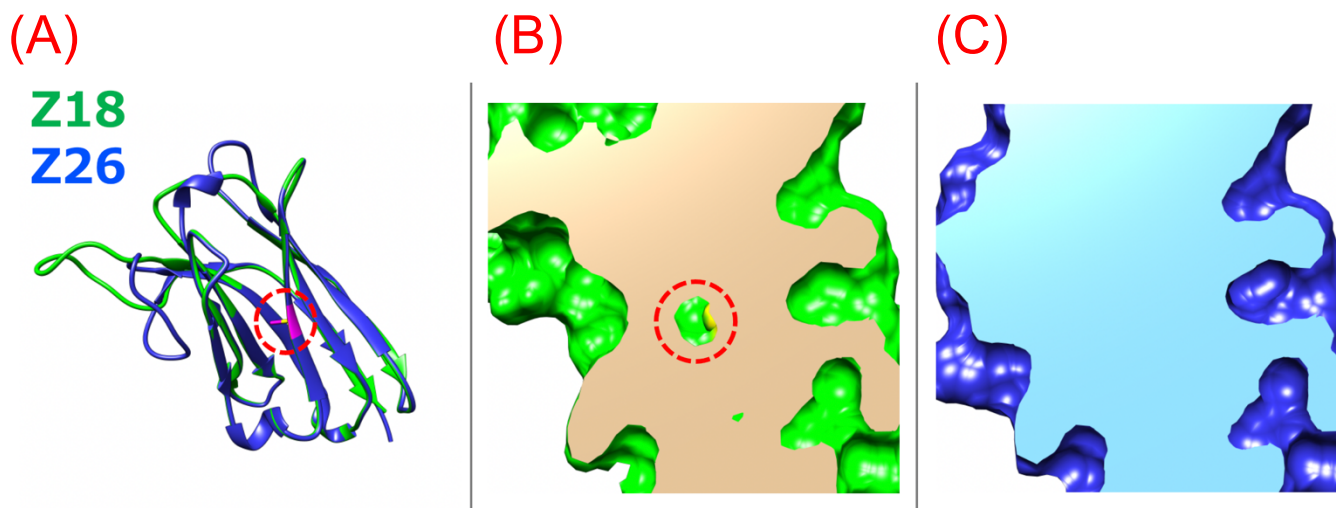

**Figure S3. A cavity observed inside the predicted structure of Z18.** (A) The superposed structures of Z18 (green) and Z26 (blue). The sliced models of (B) Z18 and (C) Z26. The cavity is highlighted by a red circle in (A) and (B).

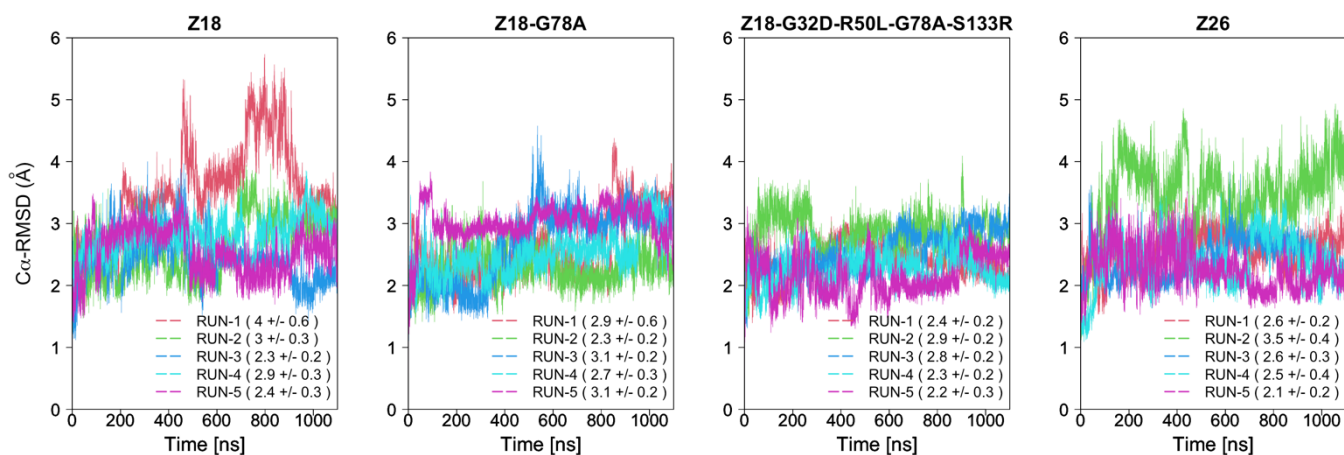

**Figure S4. RMSD of C $\alpha$ -atoms of entire antibody structures.** The average and standard deviation are calculated using the last 500 ns trajectories and are provided in the parenthesis in each simulation.

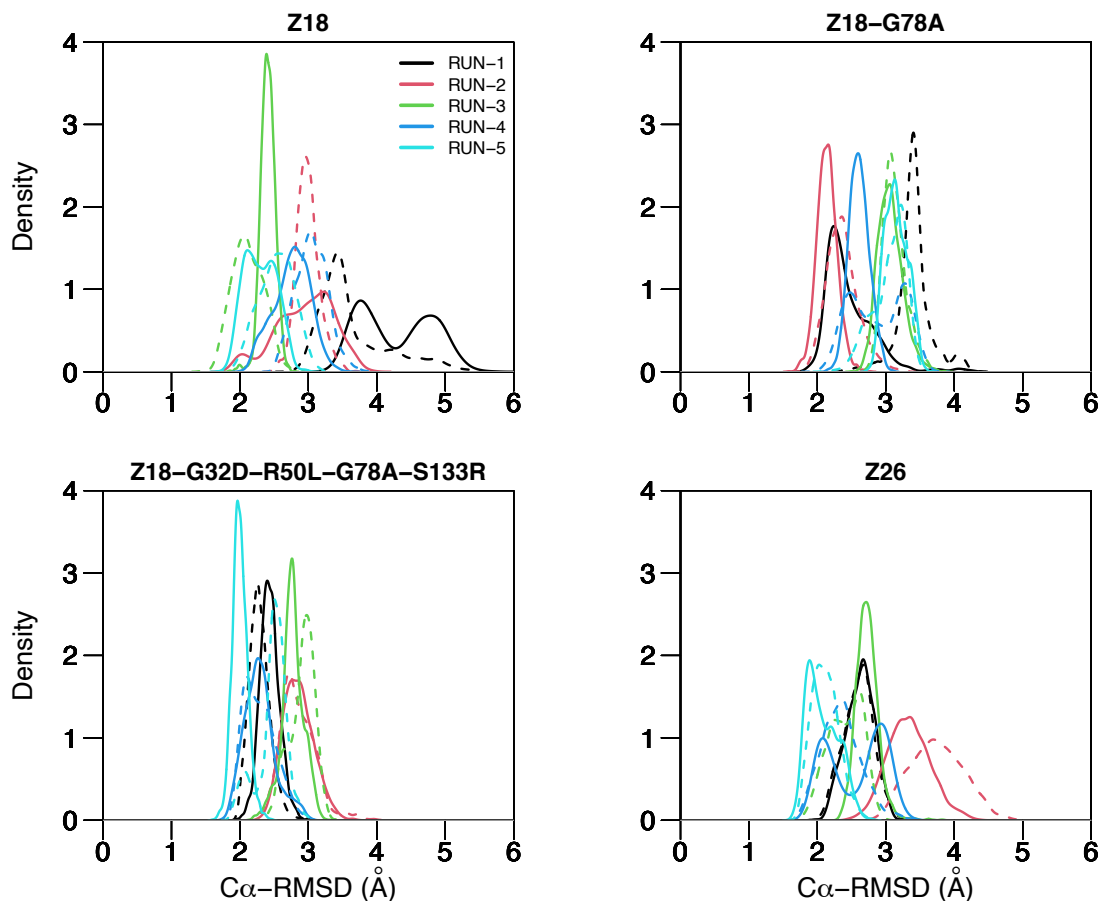

**Figure S5. Substantial overlaps between the first half (straight line) and last half (dotted line) of each trajectory.**

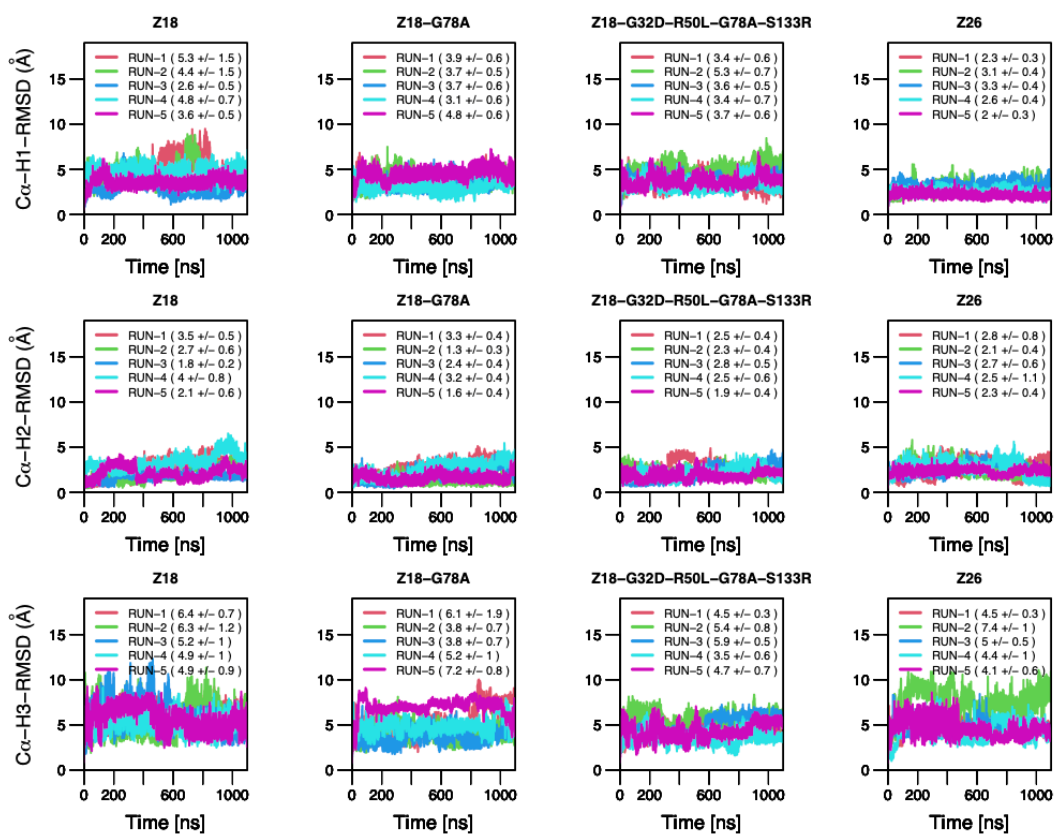

**Figure S6. RMSD of C $\alpha$ -atoms of each CDRs.** The average and standard deviation are calculated using the last 500 ns trajectories and are provided in the parenthesis in each simulation.

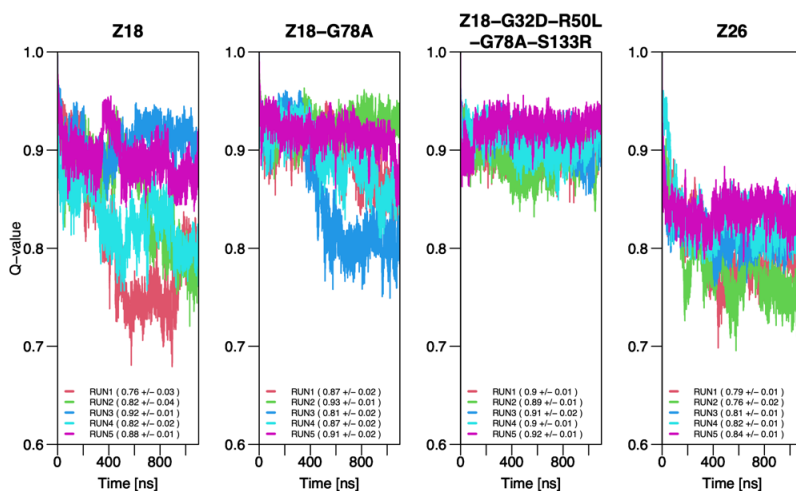

**Figure S7. Fraction of native contacts.** The average and standard deviation are calculated using the last 500 ns trajectories and are provided in the parenthesis in each simulation.

**Table S1. Structural templates used in antibody modeling.** The PDB ID is shown for each component.

|        | Z18  | Z26  |
|--------|------|------|
| CDR-H1 | 4krn | 4qlr |
| CDR-H2 | 4qo1 | 4qo1 |
| CDR-H3 | 5en2 | 2vyr |
| FRH    | 4o9h | 1dlf |

**Table S2. Convergence of each trajectory.** The average and standard deviation are calculated using the last 500 ns trajectories.

|       | Z18                    | Z18-G78A  | Z18-G32D-R50L-G78A-S133R | Z26       |
|-------|------------------------|-----------|--------------------------|-----------|
| RUN-1 | 4.0 ± 0.6 <sup>1</sup> | 2.9 ± 0.6 | 2.4 ± 0.2                | 2.6 ± 0.2 |
| RUN-2 | 3.0 ± 0.3              | 2.3 ± 0.2 | 2.9 ± 0.2                | 3.5 ± 0.4 |
| RUN-3 | 2.3 ± 0.2              | 3.1 ± 0.2 | 2.8 ± 0.2                | 2.6 ± 0.3 |
| RUN-4 | 2.9 ± 0.3              | 2.7 ± 0.3 | 2.3 ± 0.2                | 2.5 ± 0.4 |
| RUN-5 | 2.4 ± 0.3              | 3.1 ± 0.2 | 2.2 ± 0.3                | 2.1 ± 0.2 |

<sup>1</sup> Since the RMSD values deviated from those of the other 4 simulations, we have excluded the trajectory from subsequent analyses.
